# Supplementary material for: Novel monoclonal antibodies to normal and pathologically altered human TDP-43 proteins
Source: PubMed Central journal article supplement (PMC4023626; doi:10.1186/2051-5960-2-33), 2014-03-31
Supplement: 2051-5960-2-33-S1.pdf [file 2051-5960-2-33-S1.pdf]

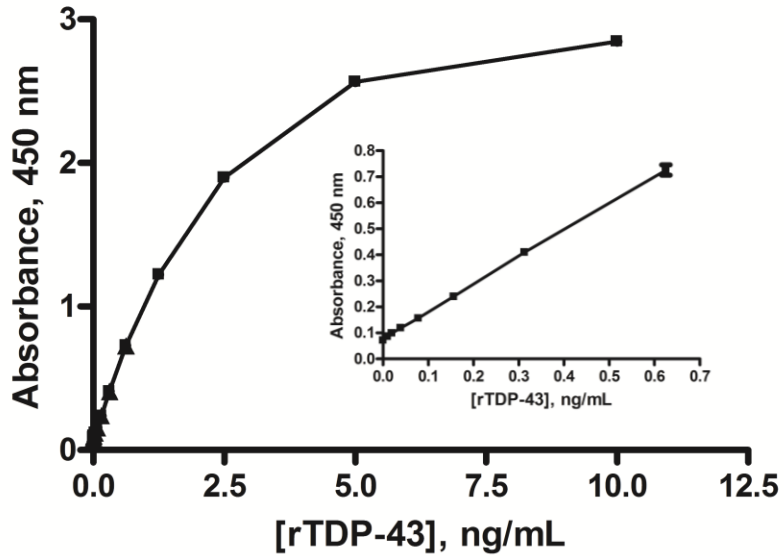

**Fig. 1S** Representative ELISA results for a newly developed MAb. Representative data from a sandwich ELISA using MAb 205 as capture and a rabbit polyclonal antibody to the C-terminus of TDP-43 using human rTDP-43 is shown. The lower limit of detection of human rTDP-43 for this ELISA is <25 pg/mL and the linear range for this ELISA is shown in the insert

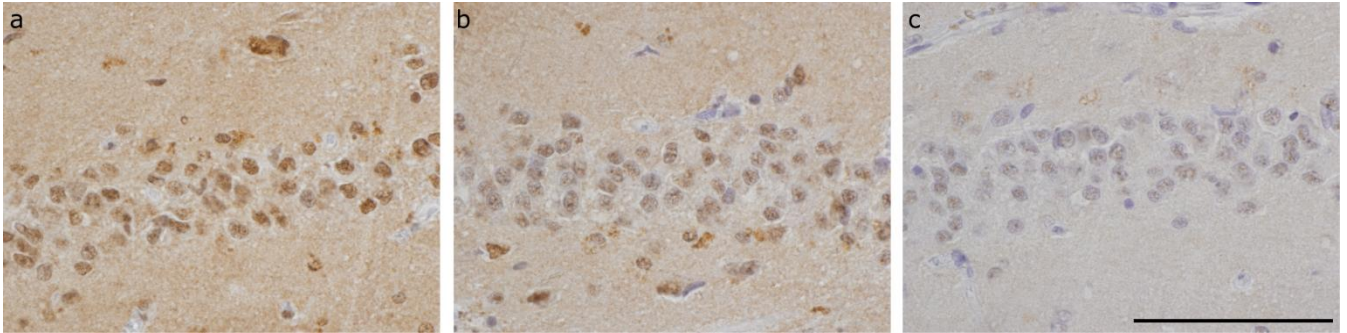

**Fig. 2S** Serial Dilutions of MAb 138 show minimal nuclear reactivity. Shown here are IHC results of serial dilutions of purified MAb 138 IgG from 0.3 µg/ml (a), 0.1 µg/ml (b) and 0.03 µg/ml (c) in normal control human dentate gyrus. Note that when this IgG is used at a concentration of 0.03 µg/ml, both the background neuropil staining and nuclear staining are eliminated while at this concentration MAb 138 recognizes pathological TDP-43 inclusions as shown in Fig. 4. Scale bar= 100 µm

**Table-S1. Summary of patient demographics**

| <b>Neuropathological diagnosis</b> | <b>Age at Death, years</b> | <b>Sex</b> | <b>PMI, hours</b> | <b>Brain-weight, grams</b> | <b>Fixative</b> |
|------------------------------------|----------------------------|------------|-------------------|----------------------------|-----------------|
| ALS                                | 55                         | F          | 6                 | 1480                       | NBF             |
| FTLD-TDP type A                    | 49                         | F          | 6                 | 591                        | NBF             |
| FTLD-TDP type B*                   | 73                         | F          | 11                | 1033                       | NBF             |
| FTLD-TDP type C                    | 76                         | M          | NA                | 1200                       | NBF             |
| FTLD-TDP type D                    | 70                         | F          | 6                 | 1022                       | ETOH            |
| Normal Control                     | 68                         | M          | 21                | 1330                       | NBF             |
| Alzheimer Disease Control          | 85                         | M          | 24                | 1440                       | ETOH            |

Abbreviations: PMI= post-mortem interval, NA= not available, ETOH= 70% ethanol with 150 mmol sodium chloride, NBF= 10% neural-buffered formalin.

\*This case had secondary diagnoses of Transitional Stage Lewy body disease and hippocampal sclerosis.
